# Supplementary material
Source: Springer Nature journal article supplement (https://www.springermedizin.de/resource/supplementary/12982_2009_88_MOESM1_ESM.pdf/9604460)

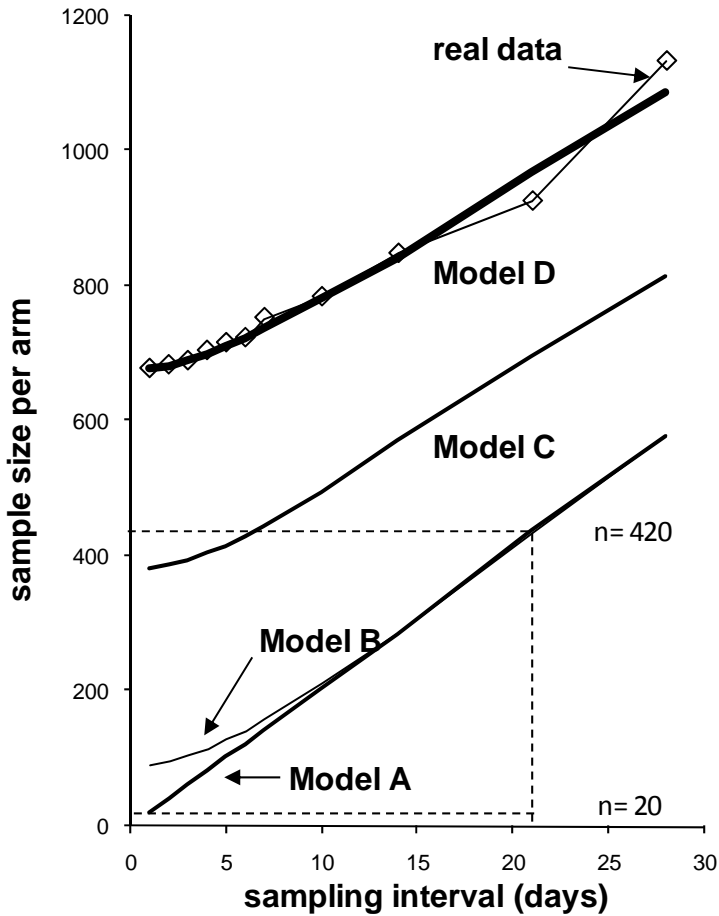

Supplement: MOESM1 [file 9604460]
